# Supplementary material for: Dynamic Changes, Spatiotemporal Differences, and Ecological Effects of Impervious Surfaces in the Yellow River Basin, 1986–2020
Source: MDPI journal article supplement (doi:10.3390/rs15010268), 2023-01-02
Supplement: s1 [file s1]

# Dynamic changes, spatiotemporal differences, and ecological effects of impervious surfaces in the Yellow River Basin, 1986–2020

## Supplementary Materials

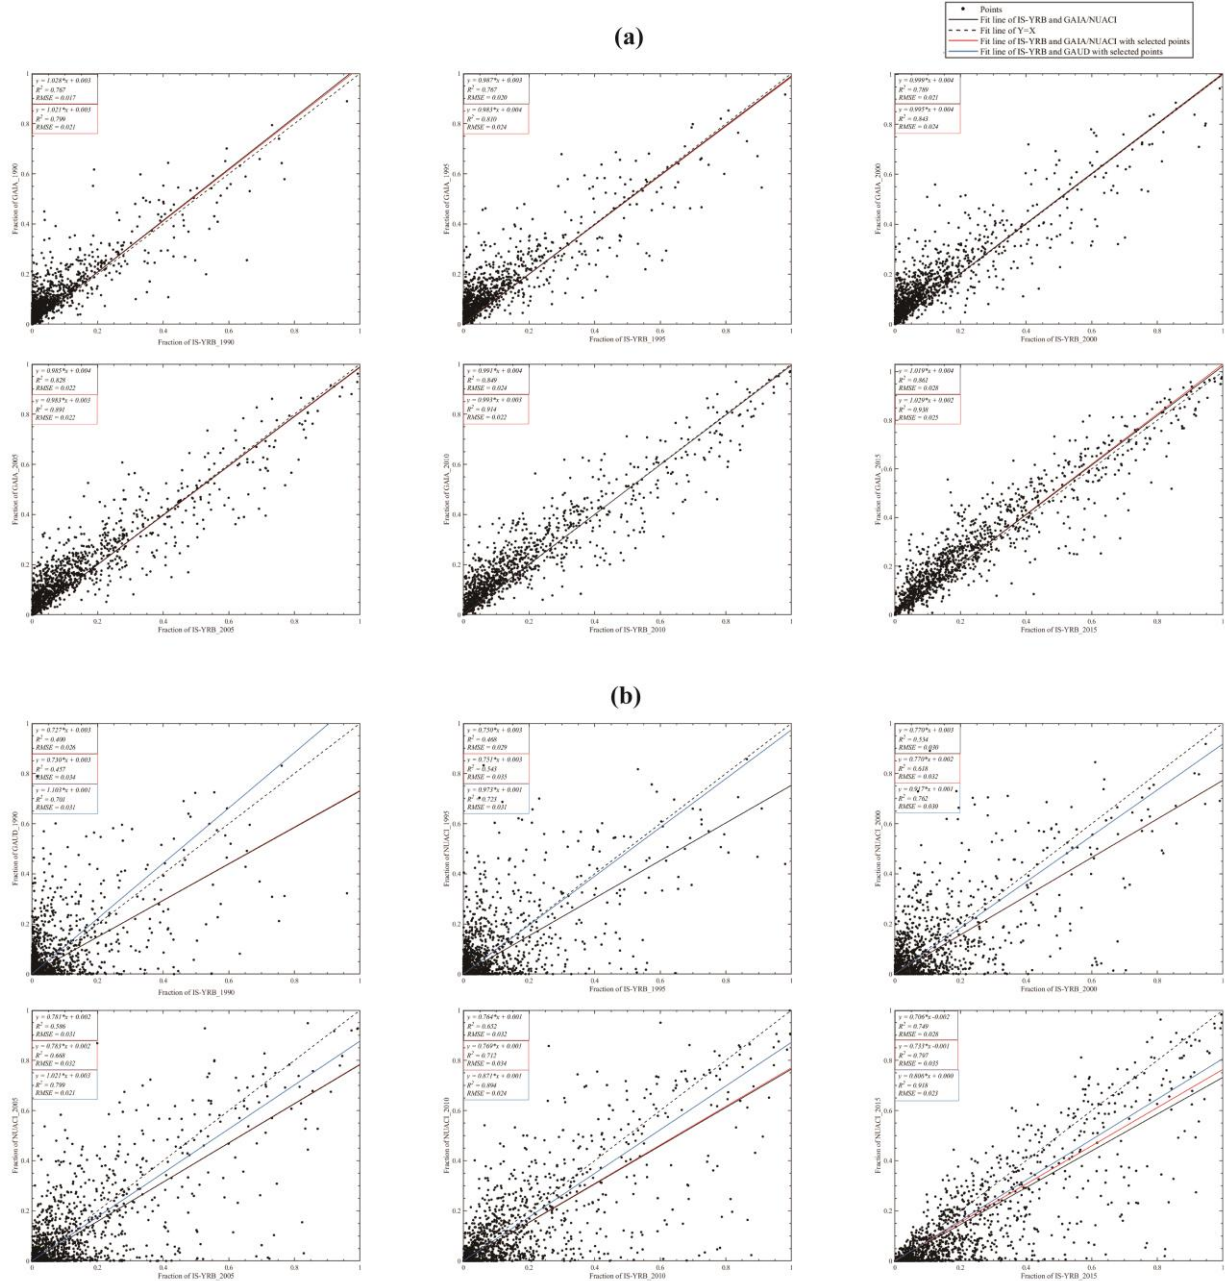

**Figure S1.** Scatterplots between impervious surfaces-Yellow River Basin (IS-YRB) and global artificial impervious areas/normalized urban areas composite index/global annual urban dynamics (GAIA/NUACI/GAUD) datasets with selected points which stripped the villages and towns agglomeration areas in 1990, 1995, 2000, 2005, 2010, and 2015: the scatterplots between (a) IS-YRB and GAIA and (b) between IS-YRB and NUACI/GAUD.

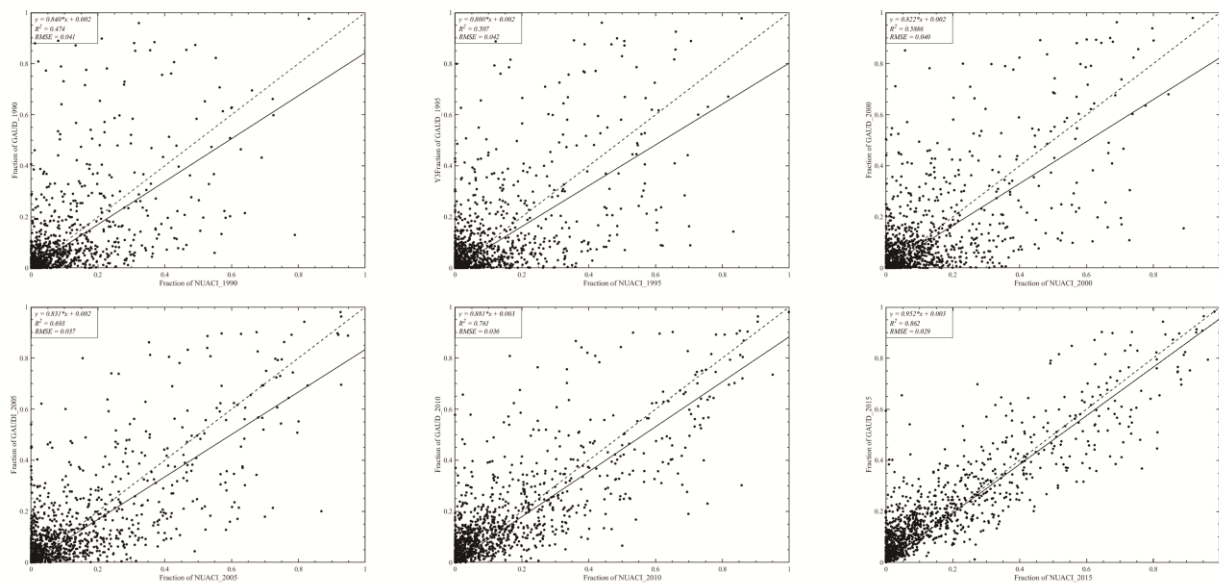

**Figure S2.** Scatterplots between normalized urban areas composite index (NUACI) and global annual urban dynamics (GAUD) datasets in 1990, 1995, 2000, 2005, 2010, and 2015.

**Table S1** ES of cities with impervious surfaces areas over 100km<sup>2</sup> in 2020

|            | ES <sub>86-90</sub> | ES <sub>91-95</sub> | ES <sub>96-00</sub> | ES <sub>01-05</sub> | ES <sub>06-10</sub> | ES <sub>11-15</sub> | ES <sub>16-20</sub> |           | ES <sub>86-90</sub> | ES <sub>91-95</sub> | ES <sub>96-00</sub> | ES <sub>01-05</sub> | ES <sub>06-10</sub> | ES <sub>11-15</sub> | ES <sub>16-20</sub> |
|------------|---------------------|---------------------|---------------------|---------------------|---------------------|---------------------|---------------------|-----------|---------------------|---------------------|---------------------|---------------------|---------------------|---------------------|---------------------|
| Xining     | 1.47                | 1.27                | 2.22                | 3.26                | 5.27                | 6.86                | 9.20                | Yuncheng  | 1.23                | 1.78                | 3.47                | 7.29                | 12.38               | 26.87               | 38.49               |
| Lanzhou    | 6.33                | 2.26                | 4.89                | 9.06                | 7.81                | 11.77               | 23.56               | Jinzhong  | 4.03                | 3.94                | 5.61                | 8.75                | 12.24               | 20.58               | 22.30               |
| Qingyang   | 0.97                | 1.00                | 0.93                | 4.65                | 1.19                | 4.02                | 9.12                | Xi'an     | 4.10                | 3.43                | 7.47                | 22.81               | 16.91               | 34.13               | 39.66               |
| Tianshui   | 0.68                | 0.50                | 0.79                | 2.70                | 1.76                | 5.75                | 7.03                | Yanan     | 7.58                | 2.35                | 2.78                | 2.63                | 2.58                | 6.68                | 13.30               |
| Dingxi     | 0.78                | 0.86                | 0.94                | 1.42                | 1.52                | 3.96                | 10.33               | Baoji     | 0.95                | 0.36                | 0.92                | 4.85                | 3.55                | 12.66               | 16.53               |
| Baiyin     | 1.37                | 1.01                | 1.95                | 3.21                | 4.22                | 4.86                | 16.37               | Xianyang  | 1.42                | 0.96                | 2.25                | 6.58                | 5.08                | 18.26               | 25.75               |
| Yinchuan   | 4.08                | 2.59                | 6.25                | 7.57                | 18.02               | 34.38               | 38.15               | Yulin     | 2.61                | -3.28               | -3.55               | 32.00               | 6.70                | 31.41               | 29.24               |
| Zhongwei   | 0.66                | 0.50                | 0.92                | 1.89                | 4.43                | 10.23               | 18.21               | Weinan    | 0.97                | 1.33                | 2.22                | 7.77                | 6.64                | 18.08               | 32.74               |
| Wuzhong    | 1.76                | 1.29                | 1.40                | 4.58                | 5.07                | 10.31               | 18.24               | Zhengzhou | 2.64                | 7.57                | 9.73                | 18.87               | 18.20               | 43.19               | 49.45               |
| Shizuishan | 1.28                | 1.21                | 3.35                | 2.81                | 7.23                | 19.36               | 11.99               | Sanmenxia | 0.38                | 0.94                | 1.31                | 2.60                | 4.71                | 7.61                | 10.25               |
| Huhehaote  | 4.95                | 4.08                | 5.21                | 7.78                | 9.68                | 17.30               | 19.53               | Xinxiang  | 0.20                | 3.05                | 2.17                | 4.50                | 3.96                | 15.03               | 40.74               |
| Wuhai      | 1.026               | 1.73                | 1.94                | 3.34                | 5.32                | 11.20               | 7.75                | Luoyang   | 2.49                | 2.03                | 2.69                | 7.00                | 8.38                | 27.02               | 26.93               |
| Baotou     | 9.81                | 6.63                | 9.13                | 11.65               | 10.66               | 14.54               | 14.47               | Puyang    | 0.16                | 1.14                | 0.45                | 1.24                | 0.50                | 4.74                | 21.26               |
| Bayan Nur  | 0.46                | 0.45                | 2.90                | 2.17                | 6.26                | 11.03               | 20.70               | Jiaozuo   | 0.06                | 0.65                | 1.17                | 1.90                | 4.58                | 16.74               | 16.42               |
| Ordos      | 0.58                | -1.20               | -2.73               | 27.99               | 13.47               | 37.72               | 40.55               | AnYang    | 0.09                | 1.03                | 0.37                | 0.88                | 1.02                | 3.70                | 12.80               |
| Taiyuan    | 12.28               | 12.94               | 11.12               | 25.61               | 12.72               | 16.60               | 13.22               | Dongying  | 8.44                | 18.99               | 6.02                | 18.57               | 4.92                | 40.58               | 20.99               |
| Linfen     | 3.00                | 3.18                | 3.13                | 6.85                | 13.89               | 22.50               | 17.81               | Tai'an    | 4.66                | 7.55                | 4.88                | 9.78                | 10.88               | 43.54               | 44.41               |
| Luliang    | 5.12                | 4.29                | 3.71                | 11.11               | 21.11               | 26.25               | 28.79               | Jining    | 1.77                | 3.42                | 1.65                | 5.22                | 5.24                | 16.06               | 35.13               |
| Qizhou     | 2.11                | 0.84                | 0.88                | 3.78                | 1.01                | 6.65                | 6.03                | Laiwu     | 1.50                | 4.21                | 2.21                | 2.98                | 3.86                | 17.98               | 14.71               |
| Jincheng   | 0.22                | 0.83                | 1.16                | 1.54                | 4.82                | 8.68                | 7.64                | Bingzhou  | 1.52                | 1.92                | 0.57                | 1.84                | 1.60                | 5.51                | 6.73                |

**Note:** ES: expansion speed.

**Table S2** EI of cities with impervious surfaces areas over 100km<sup>2</sup> in 2020

|            | EI <sub>86-90</sub> | EI <sub>91-95</sub> | EI <sub>96-00</sub> | EI <sub>01-05</sub> | EI <sub>06-10</sub> | EI <sub>11-15</sub> | EI <sub>16-20</sub> |           | EI <sub>86-90</sub> | EI <sub>91-95</sub> | EI <sub>96-00</sub> | EI <sub>01-05</sub> | EI <sub>06-10</sub> | EI <sub>11-15</sub> | EI <sub>16-20</sub> |
|------------|---------------------|---------------------|---------------------|---------------------|---------------------|---------------------|---------------------|-----------|---------------------|---------------------|---------------------|---------------------|---------------------|---------------------|---------------------|
| Xining     | 0.04                | 0.03                | 0.04                | 0.04                | 0.05                | 0.05                | 0.05                | Yuncheng  | 0.05                | 0.05                | 0.06                | 0.08                | 0.08                | 0.10                | 0.09                |
| Lanzhou    | 0.05                | 0.01                | 0.03                | 0.04                | 0.03                | 0.04                | 0.06                | Jinzhong  | 0.04                | 0.03                | 0.04                | 0.04                | 0.04                | 0.05                | 0.04                |
| Qingyang   | 0.09                | 0.06                | 0.04                | 0.18                | 0.03                | 0.07                | 0.10                | Xi'an     | 0.04                | 0.02                | 0.04                | 0.11                | 0.05                | 0.07                | 0.06                |
| Tianshui   | 0.09                | 0.04                | 0.05                | 0.14                | 0.06                | 0.11                | 0.07                | Yanan     | 0.35                | 0.04                | 0.04                | 0.03                | 0.02                | 0.05                | 0.07                |
| Dingxi     | 0.27                | 0.10                | 0.06                | 0.06                | 0.05                | 0.08                | 0.12                | Baoji     | 0.05                | 0.02                | 0.03                | 0.19                | 0.07                | 0.13                | 0.10                |
| Baiyin     | 0.06                | 0.04                | 0.05                | 0.06                | 0.06                | 0.05                | 0.11                | Xianyang  | 0.06                | 0.03                | 0.05                | 0.15                | 0.07                | 0.13                | 0.10                |
| Yinchuan   | 0.08                | 0.04                | 0.06                | 0.05                | 0.08                | 0.09                | 0.07                | Yulin     | 0.02                | -0.03               | -0.03               | 0.22                | 0.06                | 0.13                | 0.08                |
| Zhongwei   | 0.07                | 0.04                | 0.05                | 0.07                | 0.10                | 0.12                | 0.11                | Weinan    | 0.03                | 0.03                | 0.04                | 0.14                | 0.07                | 0.10                | 0.11                |
| Wuzhong    | 0.08                | 0.04                | 0.04                | 0.10                | 0.07                | 0.09                | 0.10                | Zhengzhou | 0.01                | 0.02                | 0.02                | 0.04                | 0.03                | 0.05                | 0.04                |
| Shizuishan | 0.05                | 0.04                | 0.07                | 0.03                | 0.06                | 0.10                | 0.04                | Sanmenxia | 0.08                | 0.10                | 0.08                | 0.10                | 0.10                | 0.09                | 0.08                |
| Huhehaote  | 0.06                | 0.04                | 0.04                | 0.04                | 0.04                | 0.06                | 0.05                | Xinxiang  | 0.00                | 0.04                | 0.02                | 0.04                | 0.03                | 0.08                | 0.13                |
| Wuhai      | 0.04                | 0.05                | 0.04                | 0.05                | 0.06                | 0.08                | 0.04                | Luoyang   | 0.02                | 0.02                | 0.02                | 0.04                | 0.03                | 0.07                | 0.05                |
| Baotou     | 0.11                | 0.05                | 0.05                | 0.05                | 0.03                | 0.04                | 0.03                | Puyang    | 0.01                | 0.07                | 0.02                | 0.05                | 0.01                | 0.11                | 0.22                |
| Bayan Nur  | 0.04                | 0.03                | 0.13                | 0.04                | 0.09                | 0.09                | 0.10                | Jiaozuo   | 0.00                | 0.01                | 0.01                | 0.01                | 0.03                | 0.08                | 0.05                |
| Ordos      | 0.01                | -0.02               | -0.04               | 0.24                | 0.11                | 0.13                | 0.09                | AnYang    | 0.02                | 0.12                | 0.03                | 0.06                | 0.05                | 0.12                | 0.19                |
| Taiyuan    | 0.07                | 0.05                | 0.03                | 0.07                | 0.03                | 0.03                | 0.02                | Dongying  | 0.05                | 0.07                | 0.02                | 0.05                | 0.01                | 0.08                | 0.03                |
| Linfen     | 0.08                | 0.06                | 0.04                | 0.06                | 0.08                | 0.08                | 0.05                | Tai'an    | 0.08                | 0.06                | 0.03                | 0.04                | 0.04                | 0.10                | 0.07                |
| Luliang    | 0.07                | 0.04                | 0.03                | 0.05                | 0.07                | 0.06                | 0.05                | Jining    | 0.03                | 0.04                | 0.02                | 0.04                | 0.03                | 0.08                | 0.10                |
| Qizhou     | 0.19                | 0.04                | 0.03                | 0.12                | 0.02                | 0.10                | 0.06                | Laiwu     | 0.06                | 0.10                | 0.04                | 0.03                | 0.03                | 0.11                | 0.06                |
| Jincheng   | 0.00                | 0.00                | 0.01                | 0.01                | 0.02                | 0.04                | 0.03                | Bingzhou  | 0.10                | 0.07                | 0.02                | 0.04                | 0.03                | 0.08                | 0.06                |

**Note:** EI: expansion intensity.
